# Supplementary material
Source: PubMed Central journal article supplement (PMC11094620)
Supplement: jama-e247064-s003.pdf [file jama-e247064-s003.pdf]

## Supplemental Online Content

Hoddinott P, O'Dolan, Macaulay L, et al. Text messages with financial incentives for men with obesity: a randomized clinical trial *JAMA*. doi:10.1001/jama.2024.7064

**eTable 1.** Sample texts for baseline, 3 months, 6 months and 9 months

**eTable 2.** Texts sent to participants in texts within incentive group following weight measurements

**eTable 3.** Weight assessment methods for men retained in the trial at 12 months

**eTable 4.** Weight loss targets met by intervention groups between baseline and 12 months

**eTable 5.** Reasons for declining follow-up

**eTable 6.** Baseline characteristics by treatment allocation

**eTable 7.** Baseline characteristics by recruitment strategy

**eTable 8.** Text messages delivered and replied to by intervention group participants

**eTable 9.** Post-randomization website engagement by all trial participants over 12 months

**eTable 10.** Intervention group engagement with website self-monitoring and local resources webpage over 12 months

**eTable 11.** Primary outcome: percentage weight change at 12 months from baseline

**eTable 12.** Weight change in kilograms at 12 months from baseline

**eTable 13.** Weight change at 3 months and 6 months from baseline for intervention groups

**eTable 14.** Secondary outcomes by trial group

**eTable 15.** Participant satisfaction with the Game of Stones trial and weight loss progress at 12 months

**eTable 16.** Sensitivity analyses for the primary outcome

**eTable 17.** Use of publicly funded weight loss services, weight loss medications or meal replacements in previous 12 months

**eTable 18.** Sensitivity analyses for participants not taking weight loss medications or meal replacements

**eTable 19.** Harms reported by participants since last seen

**eTable 20.** Participants reporting or harms at one or more time point

**eTable 21.** MedDRA System Organ Classification of harms

**eTable 22.** Unexpected benefits reported by participants.

**eFigure.** Sensitivity analysis for participants not taking weight loss medications or meal replacements.

**eMethods**

**eReferences**

This supplemental material has been provided by the authors to give readers additional information about their work.

**eTable 1. Sample texts for baseline, 3 months, 6 months and 9 months**

|   |                                                                                                                                                                                                                                                                                                           | <b>Behavior Change Technique<sup>1</sup></b>                             | <b>Function</b>                 | <b>Logic model</b>                   |
|---|-----------------------------------------------------------------------------------------------------------------------------------------------------------------------------------------------------------------------------------------------------------------------------------------------------------|--------------------------------------------------------------------------|---------------------------------|--------------------------------------|
|   | <b>Texts sent at baseline</b>                                                                                                                                                                                                                                                                             |                                                                          |                                 |                                      |
| 1 | Welcome to Game of Stones <name>! Over 12 months we'll send you some texts. The bad news: reading texts won't change your weight. The good news: they're low calorie. We've put these texts together with the help of men who successfully lost weight. They are based on facts and real life experience. |                                                                          | General communication technique |                                      |
| 2 | The goal is to lose 5% in 12 weeks. John said the goal gave him confidence to try changing his eating knowing that he's got something to work towards. Losing more than 3% of your body weight has health benefits and helps to cut your chances of cancer, heart disease and diabetes.                   | 1.3 Goal setting (outcome)<br>5.1. Information about health consequences | Motivation                      | Motivation (weight loss goal)        |
| 3 | Ok, here's the deal. Some texts will be useful and others maybe won't. Just pick whatever works for you and ignore the rest. If you want to reply to any of the texts please do. We read every text but usually we won't be able to write back. Sorry.                                                    |                                                                          | General communication technique |                                      |
| 4 | How to lose weight? Here's a simple fact: sensible eating works... but only if you stick to it. Go to our Game of Stones webpage with links to webpages full of information that our men find useful. <a href="http://www.gameofstonesresearch.com">www.gameofstonesresearch.com</a>                      | 15.1. Verbal persuasion about capability                                 | Motivation, Engagement          | Self-efficacy (initiate weight loss) |
| 5 | Most of our men make up their own sensible eating rules. Carl said that it's straightforward, eat less rubbish. Everybody knows it, but hard to do. Cutting down and reducing portion sizes is the main strategy that works for our men. Losing weight is about finding what works for you and your life. | 4.1. Instruction on how to perform the behaviour                         | Self-regulation                 | Self-regulation (planning)           |

|   |                                                                                                                                                                                                                                                                                                                                                                          | <b>Behavior Change Technique<sup>1</sup></b>              | <b>Function</b>                 | <b>Logic model</b>                |
|---|--------------------------------------------------------------------------------------------------------------------------------------------------------------------------------------------------------------------------------------------------------------------------------------------------------------------------------------------------------------------------|-----------------------------------------------------------|---------------------------------|-----------------------------------|
| 6 | You're changing what you're eating and drinking, you're not dieting. Think about it as improving your lifestyle, not being on a diet. Check out this helpful wee booklet full of tips from the Men's Health Forum.<br><a href="http://www.issuu.com/menshealthforum/docs/eat_well_final_hrnon-border">www.issuu.com/menshealthforum/docs/eat_well_final_hrnon-border</a> | 4.3. Re-attribution                                       | Motivation, Engagement          | Motivation (intention)            |
| 7 | Have you made any changes this week <name>? Cut down on something or made some sensible eating changes? Let us know. Have a nice rest of the weekend.                                                                                                                                                                                                                    | 2.3. Self-monitoring of behaviour                         | Self-regulation, Engagement     | Self-regulation (self-monitoring) |
|   | <b>Texts sent at 3 months</b>                                                                                                                                                                                                                                                                                                                                            |                                                           |                                 |                                   |
| 1 | How's it going <name>? Let's talk special occasions: birthdays, weddings, and holidays. Some men tell us that they do well with their weight loss, then a special occasion comes along and things fall down.                                                                                                                                                             |                                                           | General communication technique |                                   |
| 2 | Carl was out for his birthday party, eating and drinking too much, so it caused him to fall back again and he's not got back into it yet. Rob says his holidays probably set him back a lot, he went a bit over the top. Do you have any words of wisdom for the Carls and Robs in this world?                                                                           | 13.1. Identification of self as role model                | Engagement                      | Self-regulation (planning)        |
| 3 | You should continue to have a good time on birthdays, weddings and holidays. But without feeling guilty. How can you do that?                                                                                                                                                                                                                                            | 1.2 Problem solving                                       | Self-regulation                 | Self-regulation (planning)        |
| 4 | Rick says that when he's got a special occasion coming up he prepares for it and makes sure he has a period where you are doing well before making loads of sensible eating choices – this way you will have earned it even more.                                                                                                                                        | 1.2 Problem solving<br>6.1 Demonstration of the behaviour | Self-regulation                 | Self-regulation (planning)        |
| 5 | Garry's golden rule is to make the first drink a soft one. He says it's easy to get carried away with the drinks and they are quite calorific. He also has regular water breaks – you can enjoy an occasion without going completely overboard.                                                                                                                          | 1.2 Problem solving<br>6.1 Demonstration of the behaviour | Self-regulation                 | Self-regulation (planning)        |

|   |                                                                                                                                                                                                     | <b>Behavior Change Technique<sup>1</sup></b>     | <b>Function</b>                                          | <b>Logic model</b>                               |
|---|-----------------------------------------------------------------------------------------------------------------------------------------------------------------------------------------------------|--------------------------------------------------|----------------------------------------------------------|--------------------------------------------------|
| 6 | Another way to handle your special occasion after they happened is to make up for it. Have a period after your birthday or holiday when you put effort into a sensible eating and drinking routine. | 4.1. Instruction on how to perform the behaviour | Self-regulation                                          | Self-regulation (planning)                       |
| 7 | It's all about balance. If your new lifestyle ruins the fun then why stick to it? If your old routines ruin your hard work, then why bother? Hope the weekend is going well...                      |                                                  | General communication technique                          |                                                  |
|   | <b>Texts sent at 6 months</b>                                                                                                                                                                       |                                                  |                                                          |                                                  |
| 1 | That's the 6 months mark! Two things are important now: Keep off any weight lost, and have your 1 year goal in mind. How confident are you that you can manage this?                                |                                                  | General communication technique, Motivation, Maintenance | Self-efficacy (Maintenance), Maintenance mindset |
| 2 | To keeping weight off Karl says he just walks loads now, cause he can do, anytime, anywhere. And he actually likes it and looks forward to get moving every day.                                    | 6.1 Demonstration of the behaviour               | Maintenance                                              | Maintenance mindset                              |
| 3 | Dave says that he's no youngster, he's heard this kinda stuff before. But he still finds it useful to remember what you know. Make sure you actually do it, not just know it.                       |                                                  | General communication technique                          |                                                  |
| 4 | What are your eating plans for tomorrow? Keep staying ahead of the game.                                                                                                                            | 1.4 Action planning                              | Engagement, Self-regulation                              | Self-regulation (planning)                       |
| 5 | Gavin says his weight stays roughly the same, but he still tries new stuff. Just because you want your weight to stay the same, doesn't mean that you have to do the same things all the time.      | 13.2. Framing/reframing                          | Maintenance                                              | Maintenance mindset                              |
| 6 | Jim likes to remember IF and THEN. What is your main obstacle to sensible eating? IF you run into it, THEN what will you do?                                                                        | 1.2 Problem solving<br>1.4 Action planning       | Engagement<br>Self-regulation                            | Self-regulation (planning)                       |

|   |                                                                                                                                                                                                    | <b>Behavior Change Technique<sup>1</sup></b>               | <b>Function</b>                                                           | <b>Logic model</b>                                 |
|---|----------------------------------------------------------------------------------------------------------------------------------------------------------------------------------------------------|------------------------------------------------------------|---------------------------------------------------------------------------|----------------------------------------------------|
| 7 | What's been your success this week? We take anything, the smaller and more unusual the better!                                                                                                     | 2.1. Monitoring of behaviour by others without feedback    | Engagement<br>Self-regulation                                             |                                                    |
|   | <b>Texts sent at 9 months</b>                                                                                                                                                                      |                                                            |                                                                           |                                                    |
| 1 | Are your habits and routines working for you? Does your auto pilot work for or against you at the moment?                                                                                          |                                                            | Engagement,<br>Maintenance                                                | Habits                                             |
| 2 | Dave says that some folk need the arm round the shoulder, some folk need the boot up the backside. Do you have enough arms and boots around you when needed?                                       | 3.1. Social support                                        | Engagement,<br>Motivation,<br>Self-regulation,<br>Maintenance             | Motivation, Self-<br>efficacy, Self-<br>regulation |
| 3 | We covered a lot of things that help with weight loss and keeping it off. They work best when used... ok, you're right, they only work when used. Which are the ones you will keep using and when? | 1.4 Action planning                                        | Engagement,<br>General<br>communication<br>technique,<br>Maintenance      | Self-regulation,<br>Maintenance<br>mindset         |
| 4 | Once every couple of weeks Carl sits down and scrolls through the messages, good reminder and some things you miss when you just read them quickly on the go.                                      | 6.1 Demonstration of the behaviour                         | Adjuvant<br>behaviours,<br>Motivation,<br>Self-regulation,<br>Maintenance | Self-regulation                                    |
| 5 | Weekend coming up, finally! Remember Gavin's tip: the power of meal prep. Helps you stay ahead. Time for another batch prep session?                                                               | 1.2 Problem solving                                        | Adjuvant<br>behaviours,<br>Self-regulation                                | Self-regulation<br>(planning)                      |
| 6 | Think back to 9 months ago <name>? How happy are you with the things you have achieved?                                                                                                            | 1.7 Review outcome goal(s),<br>15.3. Focus on past success | Engagement,<br>Maintenance                                                | Maintenance<br>Motives                             |
| 7 | Tim says he feels like a different person now after 9 months. He cares about food, loves his walking. A year ago, he was a totally different Tim.                                                  | 13.4. Valued self-identify                                 | Maintenance                                                               | Maintenance<br>Motives,<br>Maintenance<br>mindset  |

**eTable 2. Texts sent to participants in texts within incentive group following weight measurements**

| Time point | Target met?                                                          | Message Template <sup>a</sup>                                                                                                                                                                                                                                 |
|------------|----------------------------------------------------------------------|---------------------------------------------------------------------------------------------------------------------------------------------------------------------------------------------------------------------------------------------------------------|
| 3 months   | Target met                                                           | Thanks for attending the weigh-in. You lost {0} <sup>a</sup> kg ({1} st {2} lbs) or {3}% of your starting weight. You met the 5% target and secured £50. Congratulations! You can secure another £350 at the later weigh-ins                                  |
| 3 months   | Target not met, but weight < baseline                                | Thanks for attending the weigh-in. You lost {0} kg ({1} st {2} lbs), or {3}% of your starting weight. You did not meet 5% target. You have lost £50, but still have the chance to get £350 at the later weigh-ins                                             |
| 3 months   | Target not met, weight equal to baseline                             | Thanks for attending the weigh-in. Your weight did not change from your starting weight. You did not meet 5% target. You have lost £50, but still have the chance to get £350 at the later weigh-ins                                                          |
| 3 months   | Target not met, weight > baseline                                    | Thanks for attending the weigh-in. You gained {0} kg ({1} st {2} lbs), or {3}% of your starting weight. You did not meet 5% target. You have lost £50, but still have the chance to get £350 at the later weigh-ins                                           |
| 3 months   | Weight not taken within 23 day time window and/or on research scales | Unfortunately, as discussed, your weight did not qualify for an incentive. All weights matter to us and contribute to our research. You have lost £50, but still have the chance to get £350 at the later weigh-ins                                           |
| 6 months   | Target met                                                           | Thanks for attending the weigh-in. You lost {0} kg ({1} st {2} lbs) or {3}% of your starting weight. You met the 10% target and secured £150. Congratulations! You can secure another £200 at the later weigh-ins                                             |
| 6 months   | Target not met, weight loss <5% from baseline                        | Thanks for attending the weigh-in. You lost {0} kg ({1} st {2} lbs), or {3}% of your starting weight. You did not meet the minimum 5% target. You lost £150, but still have the chance to get £200 at the later weigh-ins                                     |
| 6 months   | Target not met, - weight loss between 5-10% from baseline            | Thanks for attending the weigh-in. You lost {0} kg ({1} st {2} lbs), or {3}% of your starting weight. You have secured £{4} and lost £{5}. You can secure another £200 at the later weigh-ins                                                                 |
| 6 months   | Target not met, weight equal to baseline                             | Thanks for attending the weigh-in. Your weight did not change from your starting weight. You did not meet the 10% target and lost less than 5%. You lost £150, but still have the chance to get £200 at the later weigh-ins                                   |
| 6 months   | Target not met, weight > baseline                                    | Thanks for attending the weigh-in. You gained {0} kg ({1} st {2} lbs), or {3}% of your starting weight. You did not meet the minimum 5% target. You lost £150, but still have the chance to get £200 at the later weigh-ins                                   |
| 6 months   | Weight not taken within 23 day time window and/or on research scales | Unfortunately, as discussed, your weight did not qualify for an incentive. All weights matter to us and contribute to our research. Look forward to seeing you in 12 months time. You lost £150, but still have the chance to get £200 at the later weigh-ins |
| 12 months  | Target met                                                           | Thanks for attending the weigh-in. You lost {0} kg ({1} st {2} lbs) or {3}% of your starting weight. You met the 10% target and secured £200. Congratulations! Your total Game of Stones payment is £{3m+6m+12m} Look forward to seeing you in 12 months time |
| 12 months  | Target not met, weight loss <5% from baseline                        | Thanks for attending the weigh-in. You lost {0} kg ({1} st {2} lbs), or {3}% of your starting weight. You did not meet the minimum 5% target. You lost £200. Your total Game of Stones payment is £{3m+6m+12m} Look forward to seeing you in 12 months time.  |
| 12 months  | Target not met, - weight loss between 5-10% from baseline            | Thanks for attending the weigh-in. You lost {0} kg ({1} st {2} lbs), or {3}% of your starting weight. You have secured £{4} and lost £{5}. Well done! Your total Game of Stones payment is £{3m+6m+12m} Look forward to seeing you in 12 months time          |
| 12 months  | Target not met, weight equal to baseline                             | Thanks for attending the weigh-in. Your weight did not change from your starting weight. You did not meet the 10% target and lost less                                                                                                                        |

|           |                                                                      |                                                                                                                                                                                                                                                                    |
|-----------|----------------------------------------------------------------------|--------------------------------------------------------------------------------------------------------------------------------------------------------------------------------------------------------------------------------------------------------------------|
|           |                                                                      | than 5%. You lost £200. Your total Game of Stones payment is £{3m+6m+12m}                                                                                                                                                                                          |
| 12 months | Target not met, weight > baseline                                    | Thanks for attending the weigh-in. You gained {0} kg ({1} st {2} lbs), or {3}% of your starting weight. You did not meet the minimum 5% target. You lost £200. Unfortunately you therefore do not receive any money. Look forward to seeing you in 12 months time. |
| 12 months | Weight not taken within 23 day time window and/or on research scales | Unfortunately, as discussed, your weight did not qualify for an incentive. All weights matter to us and contribute to our research. Look forward to seeing you in 12 months time.                                                                                  |

<sup>a</sup>{..} represents the automated algorithm used to calculate the participant weight change from baseline in kg or stones and pounds (participant preference); and whether the 5% and 10% weight loss targets were met.

**eTable 3. Weight assessment methods for men retained in the trial at 12 months**

|                                                                                                               | <b>Texts with incentives<br/>(N=146)</b> | <b>Texts only<br/>(N=128)</b> | <b>Waiting list<br/>(N=152)</b> | <b>Total<br/>(N=426)</b> |
|---------------------------------------------------------------------------------------------------------------|------------------------------------------|-------------------------------|---------------------------------|--------------------------|
| Weight assessment face to face with a researcher on Game of Stones study scales within 23 days of target date | 136 (93.2)                               | 118 (92.2)                    | 142 (93.4)                      | 396 (93.0)               |
| Weight assessment in person on Game of Stones study scales outside 23 days of target date                     | 5 (3.4)                                  | 2 (1.6)                       | 3 (2.0)                         | 10 (2.3)                 |
| Researcher blind to group allocation                                                                          | 141 (96.6)                               | 120 (93.8)                    | 141 (92.8)                      | 402 (94.4)               |
| Weighed on Game of Stones scales by video call with a researcher within 23 days of target date                | 1 (0.7)                                  | -                             | -                               | 1 (0.2)                  |
| Self-report weight within 23 days of target date                                                              | 1 (0.7)                                  | 2 (1.6)                       | 3 (2.0)                         | 6 (1.4)                  |
| Self-report weight outside 23 days of target date                                                             | 3 (2.1)                                  | 6 (4.7)                       | 4 (2.6)                         | 13 (3.1)                 |

**eTable 4. Weight loss targets met by intervention groups between baseline and 12 months**

| Trial group               | 3 months.             |            | 6 months              |            | 12 months             |            |
|---------------------------|-----------------------|------------|-----------------------|------------|-----------------------|------------|
|                           | Texts with incentives | Texts only | Texts with incentives | Texts only | Texts with incentives | Texts only |
|                           | N=196                 | N=194      | N=196                 | N=194      | N=196                 | N=194      |
| <5%                       | 87 (44.4)             | 82 (42.3)  | 48 (24.5)             | 55 (28.4)  | 49 (25.0)             | 54 (27.8)  |
| ≥5->6%                    | 17 (8.7)              | 8 (4.1)    | 10 (5.1)              | 4 (2.1)    | 7 (3.6)               | 11 (5.7)   |
| ≥6->7%                    | 21 (10.7)             | 3 (1.6)    | 8 (4.1)               | 7 (3.6)    | 5 (2.6)               | 3 (1.6)    |
| ≥7->8%                    | 4 (2.0)               | 3 (1.6)    | 4 (2.0)               | 2 (1.0)    | 2 (1.0)               | 5 (2.6)    |
| ≥8->9%                    | 6 (3.1)               | 1 (0.5)    | 6 (3.1)               | 4 (2.1)    | 6 (3.1)               | 2 (1.0)    |
| ≥9->10%                   | 7 (3.6)               | 3 (1.6)    | 7 (3.6)               | 4 (2.1)    | 5 (2.6)               | 3 (1.6)    |
| ≥10%                      | 5 (2.6)               | 6 (3.1)    | 39 (19.9)             | 10 (5.2)   | 40 (20.4)             | 8 (4.1)    |
| Weight gain from baseline | 23 (11.7)             | 30 (15.5)  | 18 (9.2)              | 35 (18.0)  | 32 (16.3)             | 42 (21.7)  |
| Lost to follow-up         | 26 (13.3)             | 58 (29.9)  | 56 (28.6)             | 73 (37.6)  | 50 (25.5)             | 66 (34.0)  |

**eTable 5. Reasons for declining follow-up.**

|                                         | Texts with incentives (N=196) | Texts only (N=194) | Waiting list (N=195) |
|-----------------------------------------|-------------------------------|--------------------|----------------------|
| Death                                   | -                             | -                  | 1 (0.5)              |
| Disappointed with lack of weight loss   | -                             | 1 (0.5)            | -                    |
| Health and wellbeing reasons            | 3 (1.5)                       | 1 (0.5)            | 2 (1.0)              |
| Moved away from the area                | 1 (0.5)                       | -                  | 1 (0.5)              |
| No longer interested in taking part     | -                             | -                  | 3 (1.5)              |
| Personal reasons (undisclosed)          | 3 (1.5)                       | 2 (1.0)            | -                    |
| Program or allocated group not suitable | 3 (1.5)                       | 7 (3.6)            | 2 (1.0)              |
| Safeguarding issue                      | 1 (0.5)                       | -                  | -                    |
| Work or other commitments               | 2 (1.0)                       | 3 (1.6)            | 1 (0.5)              |
| No reason given                         | 10 (5.1)                      | 15 (7.8)           | 4 (2.1)              |
| Total number declining                  | 23 (11.7)                     | 29 (14.9)          | 14 (7.2)             |



**eTable 6. Baseline characteristics by treatment allocation**

|                                                       | <b>Texts with incentives (N=196)</b> | <b>Texts only (N=194)</b> | <b>Waiting list (N=195)</b> |
|-------------------------------------------------------|--------------------------------------|---------------------------|-----------------------------|
| <b>Age<sup>a</sup> (yrs) - mean (SD); n</b>           | 50.0 (12.7); 195                     | 51.7 (13.3); 194          | 50.2 (13.9); 195            |
| ≥18-<25                                               | 2 (1.0)                              | 1 (0.5)                   | 3 (1.5)                     |
| ≥25-<45                                               | 64 (33)                              | 59 (30)                   | 70 (36)                     |
| ≥45-<65                                               | 104 (53)                             | 99 (51)                   | 90 (46)                     |
| ≥65-<75                                               | 21 (11)                              | 27 (14)                   | 25 (13)                     |
| ≥75                                                   | 4 (2.1)                              | 8 (4.1)                   | 7 (3.6)                     |
| <b>Deprivation Category - n (%)</b>                   | <b>N = 195</b>                       | <b>N = 192</b>            | <b>N = 194</b>              |
| Most deprived                                         | 48 (25)                              | 36 (19)                   | 50 (26)                     |
| More deprived                                         | 28 (14)                              | 37 (19)                   | 28 (14)                     |
| Deprived                                              | 25 (13)                              | 33 (17)                   | 29 (15)                     |
| Less deprived                                         | 39 (20)                              | 40 (21)                   | 31 (16)                     |
| Least deprived                                        | 55 (28)                              | 46 (24)                   | 56 (29)                     |
| <b>Ethnic Group<sup>a</sup> - n (%)</b>               | <b>N = 190</b>                       | <b>N = 186</b>            | <b>N = 188</b>              |
| Asian/ Asian British                                  | 2 (1.1)                              | 3 (1.6)                   | 6 (3.2)                     |
| Black/ African/ Caribbean/ Black British              | 3 (1.6)                              | 3 (1.6)                   | 3 (1.6)                     |
| Mixed/ multiple ethnic groups                         | 2 (1.1)                              | -                         | 4 (2.1)                     |
| Other                                                 | 3 (1.6)                              | 3 (1.6)                   | 2 (1.1)                     |
| Prefer not to say                                     | 1 (0.5)                              | 3 (1.6)                   | 1 (0.5)                     |
| White                                                 | 179 (94)                             | 174 (94)                  | 172 (92)                    |
| <b>Relationship status<sup>a</sup> - n (%)</b>        | <b>N = 193</b>                       | <b>N = 191</b>            | <b>N = 190</b>              |
| Married / civil partnership                           | 126 (64)                             | 116 (60)                  | 113 (56)                    |
| Co-habiting                                           | 25 (13)                              | 34 (18)                   | 37 (19)                     |
| Single (never married; never in a civil partnership)  | 30 (16)                              | 19 (9.8)                  | 27 (14)                     |
| Divorced                                              | 5 (2.6)                              | 8 (4.1)                   | 6 (3.1)                     |
| Separated                                             | 5 (2.6)                              | 6 (3.1)                   | 3 (1.5)                     |
| Widowed                                               | -                                    | 3 (1.5)                   | 3 (1.5)                     |
| Prefer not to say                                     | 2 (1.0)                              | 5 (2.6)                   | 1 (0.5)                     |
| <b>Comorbidities<sup>a</sup> - n (%)</b>              | <b>N = 196</b>                       | <b>N = 193</b>            | <b>N = 194</b>              |
| High Blood Pressure                                   | 93 (47)                              | 83 (43)                   | 86 (44)                     |
| Mental health condition                               | 51 (26)                              | 46 (24)                   | 49 (25)                     |
| Arthritis                                             | 40 (20)                              | 55 (28)                   | 47 (24)                     |
| Possible Latent Mental Health Condition               | 50 (26)                              | 48 (25)                   | 44 (23)                     |
| Diabetes                                              | 37 (19)                              | 38 (20)                   | 29 (15)                     |
| Heart condition such as angina or atrial fibrillation | 29 (15)                              | 34 (18)                   | 28 (14)                     |
| Stroke (including mini stroke)                        | 9 (4.6)                              | 3 (1.5)                   | 8 (4.1)                     |
| Cancer                                                | 6 (3.1)                              | 8 (4.1)                   | 5 (2.6)                     |
| One or more co-morbidity                              | 136 (69)                             | 136 (70)                  | 144 (74)                    |

|                                                                                  | <b>Texts with incentives (N=196)</b> | <b>Texts only (N=194)</b> | <b>Waiting list (N=195)</b> |
|----------------------------------------------------------------------------------|--------------------------------------|---------------------------|-----------------------------|
| Multiple Long-Term Conditions (MLTC)                                             | 82 (42)                              | 82 (42)                   | 71 (36)                     |
| MLTC including self-reported diabetes                                            | 33 (17)                              | 34 (18)                   | 23 (12)                     |
| <b>Physical or Mental Disability<sup>a</sup></b>                                 | <b>N = 193</b>                       | <b>N = 193</b>            | <b>N = 192</b>              |
| Disability - n (%)                                                               | 60 (31)                              | 47 (24)                   | 58 (30)                     |
| <b>Perceived wealth<sup>a</sup> - mean (SD); n</b>                               |                                      |                           |                             |
| Perceives to live in relatively wealthy neighbourhood (0-100, Strongly disagree) | 56.1 (27.7); 191                     | 54.8 (28.1); 177          | 55.4 (28.3); 182            |
| Feels relatively wealthy compared to others (0-100, Strongly disagree)           | 54.1 (23.4); 191                     | 51.1 (25.3); 174          | 53.6 (24.2); 179            |
| Feels like they have enough money (0-100, Strongly disagree)                     | 53.3 (28.5); 191                     | 55.0 (29.4); 171          | 55.6 (27.4); 180            |
| <b>Financial Strain<sup>a</sup> - n (%)</b>                                      | <b>N = 194</b>                       | <b>N = 188</b>            | <b>N = 190</b>              |
| Living comfortably                                                               | 63 (32)                              | 58 (31)                   | 58 (31)                     |
| Doing alright                                                                    | 84 (43)                              | 71 (38)                   | 80 (42)                     |
| Just about getting by                                                            | 25 (13)                              | 39 (21)                   | 34 (18)                     |
| Finding it quite difficult                                                       | 13 (6.7)                             | 10 (5.3)                  | 12 (6.3)                    |
| Finding it very difficult                                                        | 7 (3.6)                              | 5 (2.7)                   | 4 (2.1)                     |
| Prefer not to say                                                                | 2 (1.0)                              | 5 (2.7)                   | 2 (1.1)                     |
| <b>Household composition<sup>a</sup> - n (%)</b>                                 | <b>N = 196</b>                       | <b>N = 193</b>            | <b>N = 195</b>              |
| Lives alone                                                                      | 25 (13)                              | 21 (11)                   | 22 (11)                     |
| Lives with partner                                                               | 146 (75)                             | 151 (78)                  | 150 (77)                    |
| Lives with child/children                                                        | 93 (47)                              | 80 (41)                   | 71 (36)                     |
| Lives with parents                                                               | 13 (6.6)                             | 7 (3.6)                   | 17 (8.7)                    |
| Lives with friends                                                               | 2 (1.0)                              | 3 (1.5)                   | 1 (0.5)                     |
| Other                                                                            | 9 (4.6)                              | 4 (2.1)                   | 2 (1.0)                     |
| Household size - mean (SD); n                                                    | 2.8 (1.3); 192                       | 2.7 (1.3); 190            | 2.6 (1.1); 187              |
| <b>Highest educational qualification<sup>a</sup> - n (%)</b>                     | <b>N = 182</b>                       | <b>N = 166</b>            | <b>N = 174</b>              |
| Degree level or above                                                            | 92 (51)                              | 71 (43)                   | 86 (49)                     |
| Another kind of qualification                                                    | 90 (49)                              | 95 (57)                   | 88 (51)                     |
| <b>Employment Status<sup>a</sup> - n (%)</b>                                     | <b>N = 192</b>                       | <b>N = 186</b>            | <b>N = 190</b>              |
| Paid job - Full time (30+ hours per week)                                        | 120 (63)                             | 100 (54)                  | 114 (60)                    |
| Paid job - Part time (8-29 hours per week)                                       | 9 (4.7)                              | 13 (6.9)                  | 11 (5.8)                    |
| Paid job - Part time (Under 8 hours per week)                                    | 1 (0.5)                              | 2 (1.1)                   | -                           |
| Self-employed                                                                    | 14 (7.3)                             | 21 (11)                   | 13 (6.8)                    |
| Full time student                                                                | 2 (1.0)                              | 2 (1.1)                   | 1 (0.5)                     |
| Unemployed and seeking work                                                      | 2 (1.0)                              | 3 (1.6)                   | 4 (2.1)                     |
| Retired                                                                          | 26 (14)                              | 35 (19)                   | 37 (20)                     |
| Not in paid work due to illness or disability                                    | 11 (5.7)                             | 10 (5.4)                  | 8 (4.2)                     |
| Not in paid work for other reason                                                | -                                    | -                         | 1 (0.5)                     |
| Other                                                                            | 6 (3.1)                              | -                         | 1 (0.5)                     |
| Prefer not to say                                                                | 1 (0.5)                              | -                         | -                           |

|                                                                | <b>Texts with incentives (N=196)</b> | <b>Texts only (N=194)</b> | <b>Waiting list (N=195)</b> |
|----------------------------------------------------------------|--------------------------------------|---------------------------|-----------------------------|
| <b>Access to self-monitoring equipment<sup>a</sup> - n (%)</b> | N = 195                              | N = 191                   | N = 193                     |
| Owns scales for self-weighing                                  | 166 (85)                             | 156 (82)                  | 165 (85)                    |
| Scales link to internet/app                                    | 29 (15)                              | 16 (8.4)                  | 31 (16)                     |
| Owns an activity tracker/pedometer                             | 101 (52)                             | 96 (50)                   | 120 (62)                    |
| Highest weight (kg) - mean (SD); n                             | 126.0 (21.8); 190                    | 123.6 (20.8); 185         | 124.0 (23.9); 191           |
| Lowest weight (kg) - mean (SD); n                              | 91.4 (18.8); 185                     | 89.7 (15.9); 184          | 90.2 (17.5); 189            |
| Intended weight loss in study (kg) - mean (SD); n              | 23.7 (16.1); 189                     | 23.4 (15.5); 185          | 21.7 (14.0); 188            |
| Weight loss attempts - median (P25, P75); n                    | 6.0 (3.0-10.0); 188                  | 5.0 (3.0-10.0); 187       | 5.0 (3.0-10.0); 192         |
| <b>Measured weight and height</b>                              | <b>N = 196</b>                       | <b>N = 194</b>            | <b>N = 195</b>              |
| Weight (kg) - mean (SD)                                        | 120.3 (20.1)                         | 117.2 (17.9)              | 118.1 (21.6)                |
| Height (cm) - mean (SD)                                        | 177.5 (7.1)                          | 177.1 (6.9)               | 176.8 (7.7)                 |
| BMI (kg/m <sup>2</sup> ) - mean (SD)                           | 38.2 (5.9)                           | 37.3 (4.7)                | 37.8 (6.4)                  |
| ≥30-<35; n (%)                                                 | 66 (34)                              | 73 (38)                   | 82 (42)                     |
| ≥35-<40; n (%)                                                 | 73 (37)                              | 69 (36)                   | 63 (32)                     |
| ≥40; n (%)                                                     | 57 (29)                              | 52 (27)                   | 50 (26)                     |

<sup>a</sup>Self-report

**eTable 7. Baseline characteristics by recruitment strategy**

|                                             | <b>General practice (N=217)</b> | <b>Community (N=368)</b> | <b>Total (N=585)</b> |
|---------------------------------------------|---------------------------------|--------------------------|----------------------|
| <b>Age<sup>a</sup> (yrs) - mean (SD); n</b> | 55.8 (13.4); 217                | 47.6 (12.3); 367         | 50.7 (13.3); 584     |
| ≥18-<25                                     | 2 (0.9)                         | 4 (1.1)                  | 6 (1.0)              |
| ≥25-<45                                     | 47 (22)                         | 146 (40)                 | 193 (33)             |
| ≥45-<65                                     | 106 (49)                        | 187 (51)                 | 293 (50)             |
| ≥65-<75                                     | 46 (21)                         | 27 (7.3)                 | 73 (13)              |
| ≥75                                         | 16 (7.4)                        | 3 (0.8)                  | 19 (3.2)             |
| <b>Deprivation Category - n (%)</b>         | <b>N = 216</b>                  | <b>N = 365</b>           | <b>N = 581</b>       |
| Most deprived                               | 50 (23)                         | 84 (23)                  | 134 (23)             |
| More deprived                               | 36 (17)                         | 57 (16)                  | 93 (16)              |
| Deprived                                    | 26 (12)                         | 61 (17)                  | 87 (15)              |
| Less deprived                               | 38 (18)                         | 72 (20)                  | 110 (19)             |
| Least deprived                              | 66 (31)                         | 91 (25)                  | 157 (27)             |
| <b>Ethnic Group<sup>a</sup> - n (%)</b>     | <b>N = 206</b>                  | <b>N = 358</b>           | <b>N = 564</b>       |
| Asian/ Asian British                        | 3 (1.5)                         | 8 (2.2)                  | 11 (1.9)             |
| Black/ African/ Caribbean/ Black British    | 5 (2.4)                         | 4 (1.1)                  | 9 (1.6)              |
| Mixed/ multiple ethnic groups               | -                               | 6 (1.7)                  | 6 (1.1)              |
| Other                                       | 4 (1.9)                         | 4 (1.1)                  | 8 (1.4)              |

|                                                                                  | <b>General practice<br/>(N=217)</b> | <b>Community<br/>(N=368)</b> | <b>Total<br/>(N=585)</b> |
|----------------------------------------------------------------------------------|-------------------------------------|------------------------------|--------------------------|
| Prefer not to say                                                                | 3 (1.5)                             | 2 (0.6)                      | 5 (0.9)                  |
| White                                                                            | 191 (93)                            | 334 (93)                     | 525 (93)                 |
| <b>Relationship status - n (%)</b>                                               | <b>N = 213</b>                      | <b>N = 361</b>               | <b>N = 574</b>           |
| Married / civil partnership                                                      | 140 (66)                            | 215 (60)                     | 355 (62)                 |
| Co-habiting                                                                      | 29 (14)                             | 67 (19)                      | 96 (17)                  |
| Single (never married; never in a civil partnership)                             | 21 (9.9)                            | 55 (15)                      | 76 (13)                  |
| Divorced                                                                         | 9 (4.2)                             | 10 (2.8)                     | 19 (3.3)                 |
| Separated                                                                        | 4 (1.9)                             | 10 (2.8)                     | 14 (2.4)                 |
| Widowed                                                                          | 5 (2.3)                             | 1 (0.3)                      | 6 (1.0)                  |
| Prefer not to say                                                                | 5 (2.3)                             | 3 (0.8)                      | 8 (1.4)                  |
| <b>Comorbidities<sup>a</sup> - n (%)</b>                                         | <b>N = 217</b>                      | <b>N = 367</b>               | <b>N = 584</b>           |
| High Blood Pressure                                                              | 119 (55)                            | 143 (39)                     | 262 (45)                 |
| Mental health condition                                                          | 44 (20)                             | 102 (28)                     | 146 (25)                 |
| Arthritis                                                                        | 71 (33)                             | 71 (19)                      | 142 (24)                 |
| Possible Latent Mental Health Condition                                          | 54 (25)                             | 88 (24)                      | 142 (24)                 |
| Diabetes                                                                         | 55 (25)                             | 49 (13)                      | 104 (18)                 |
| Heart condition such as angina or atrial fibrillation                            | 48 (22)                             | 43 (12)                      | 91 (16)                  |
| Stroke (including mini stroke)                                                   | 14 (6.5)                            | 6 (1.6)                      | 20 (3.4)                 |
| Cancer                                                                           | 8 (3.7)                             | 11 (3.0)                     | 19 (3.2)                 |
| One or more co-morbidity                                                         | 171 (79)                            | 245 (67)                     | 416 (71)                 |
| Multiple Long-Term Conditions (MLTC)                                             | 109 (50)                            | 126 (34)                     | 235 (40)                 |
| MLTC including self-reported diabetes                                            | 49 (23)                             | 41 (11)                      | 90 (15)                  |
| <b>Physical or Mental Disability<sup>a</sup></b>                                 | <b>N = 214</b>                      | <b>N = 364</b>               | <b>N = 578</b>           |
| Disability - n (%)                                                               | 59 (28)                             | 106 (29)                     | 165 (29)                 |
| <b>Perceived wealth<sup>a</sup> - mean (SD); n</b>                               |                                     |                              |                          |
| Perceives to live in relatively wealthy neighbourhood (0-100, Strongly disagree) | 55.6 (27.8); 199                    | 55.4 (28.2); 351             | 55.4 (28.0); 550         |
| Feels relatively wealthy compared to others (0-100, Strongly disagree)           | 51.5 (24.4); 195                    | 53.8 (24.3); 349             | 53.0 (24.3); 544         |
| Feels like they have enough money (0-100, Strongly disagree)                     | 53.7 (28.6); 195                    | 55.1 (28.3); 347             | 54.6 (28.4); 542         |
| <b>Financial Strain<sup>a</sup> - n (%)</b>                                      | <b>N = 211</b>                      | <b>N = 361</b>               | <b>N = 572</b>           |
| Living comfortably                                                               | 64 (30)                             | 115 (32)                     | 179 (31)                 |
| Doing alright                                                                    | 93 (44)                             | 142 (39)                     | 235 (41)                 |
| Just about getting by                                                            | 32 (15)                             | 66 (18)                      | 98 (17)                  |
| Finding it quite difficult                                                       | 13 (6.2)                            | 22 (6.1)                     | 35 (6.1)                 |
| Finding it very difficult                                                        | 5 (2.4)                             | 11 (3.0)                     | 16 (2.8)                 |
| Prefer not to say                                                                | 4 (1.9)                             | 5 (1.4)                      | 9 (1.6)                  |
| <b>Household composition - n (%)</b>                                             | <b>N = 217</b>                      | <b>N = 367</b>               | <b>N = 584</b>           |
| Lives alone                                                                      | 20 (9.2)                            | 48 (13)                      | 68 (12)                  |

|                                                                | <b>General practice<br/>(N=217)</b> | <b>Community<br/>(N=368)</b> | <b>Total<br/>(N=585)</b> |
|----------------------------------------------------------------|-------------------------------------|------------------------------|--------------------------|
| Lives with partner                                             | 171 (79)                            | 276 (75)                     | 447 (77)                 |
| Lives with child/children                                      | 91 (42)                             | 153 (42)                     | 244 (42)                 |
| Lives with parents                                             | 13 (6.0)                            | 24 (6.5)                     | 37 (6.3)                 |
| Lives with friends                                             | 1 (0.5)                             | 5 (1.4)                      | 6 (1.0)                  |
| Other                                                          | 9 (4.1)                             | 6 (1.6)                      | 15 (2.6)                 |
| Household size - mean (SD); n                                  | 2.7 (1.2); 209                      | 2.7 (1.2); 360               | 2.7 (1.2); 569           |
| <b>Highest educational qualification<sup>a</sup> - n (%)</b>   | <b>N = 177</b>                      | <b>N = 345</b>               | <b>N = 522</b>           |
| Degree level or above                                          | 66 (37)                             | 183 (53)                     | 249 (48)                 |
| Another kind of qualification                                  | 111 (63)                            | 162 (47)                     | 273 (52)                 |
| <b>Employment Status<sup>a</sup> - n (%)</b>                   | <b>N = 209</b>                      | <b>N = 359</b>               | <b>N = 568</b>           |
| Paid job - Full time (30+ hours per week)                      | 96 (46)                             | 238 (66)                     | 334 (59)                 |
| Paid job - Part time (8-29 hours per week)                     | 14 (6.7)                            | 19 (5.3)                     | 33 (5.8)                 |
| Paid job - Part time (Under 8 hours per week)                  | 3 (1.4)                             | -                            | 3 (0.5)                  |
| Self-employed                                                  | 22 (11)                             | 26 (7.2)                     | 48 (8.4)                 |
| Full time student                                              | -                                   | 5 (1.4)                      | 5 (0.9)                  |
| Unemployed and seeking work                                    | 2 (0.9)                             | 7 (1.9)                      | 9 (1.6)                  |
| Retired                                                        | 53 (25)                             | 45 (13)                      | 98 (17)                  |
| Not in paid work due to illness or disability                  | 13 (6.2)                            | 16 (4.4)                     | 29 (5.1)                 |
| Not in paid work for other reason                              | 1 (0.5)                             | -                            | 1 (0.2)                  |
| Other                                                          | 4 (1.9)                             | 3 (0.8)                      | 7 (1.2)                  |
| Prefer not to say                                              | 1 (0.5)                             | -                            | 1 (0.2)                  |
| <b>Access to self-monitoring equipment<sup>a</sup> - n (%)</b> | <b>N = 215</b>                      | <b>N = 365</b>               | <b>N = 580</b>           |
| Owns scales for self-weighing                                  | 173 (81)                            | 303 (83)                     | 476 (82)                 |
| Scales link to internet/app                                    | 20 (9.3)                            | 56 (15)                      | 76 (13)                  |
| Owns an activity tracker/pedometer                             | 85 (40)                             | 232 (64)                     | 317 (55)                 |
| Highest weight (kg) - mean (SD); n                             | 123.3 (20.7); 206                   | 125.3 (23.0); 360            | 124.6 (22.2); 566        |
| Lowest weight (kg) - mean (SD); n                              | 90.0 (16.0); 202                    | 90.6 (18.2); 356             | 90.4 (17.4); 558         |
| Intended weight loss in study (kg) - mean (SD); n              | 22.8 (16.9); 208                    | 23.0 (14.2); 354             | 22.9 (15.2); 562         |
| Weight loss attempts - median (P25, P75); n                    | 5.0 (3.0-10.0); 207                 | 6.0 (4.0-10.0); 360          | 6 (3-10); 567            |
| <b>Measured weight and height</b>                              | <b>N = 217</b>                      | <b>N = 368</b>               | <b>N = 585</b>           |
| Weight (kg) - mean (SD)                                        | 116.8 (18.2)                        | 119.6 (20.8)                 | 118.5 (19.9)             |
| Height (cm) - mean (SD)                                        | 177.0 (7.0)                         | 177.2 (7.4)                  | 177.2 (7.2)              |
| BMI (kg/m <sup>2</sup> ) - mean (SD)                           | 37.3 (5.3)                          | 38.0 (5.9)                   | 37.7 (5.7)               |
| ≥30-<35; n (%)                                                 | 91 (42)                             | 130 (35)                     | 221 (38)                 |
| ≥35-<40; n (%)                                                 | 72 (33)                             | 133 (36)                     | 205 (35)                 |
| ≥40; n (%)                                                     | 54 (25)                             | 105 (29)                     | 159 (27)                 |

<sup>a</sup> Self-report

**eTable 8. Text messages delivered and replied to by intervention group participants**

|                                          | <b>Texts with incentives<br/>N = 196</b> | <b>Texts only<br/>N = 194</b> | <b>Total<br/>N = 390</b> |
|------------------------------------------|------------------------------------------|-------------------------------|--------------------------|
| Texts sent - mean (SD)                   | 332.4 (80.9)                             | 317.3 (100.8)                 | 324.9 (91.6)             |
| Replying to texts, n (%)                 |                                          |                               |                          |
| 0 replies to texts                       | 54 (27.6)                                | 61 (31.4)                     | 115 (29.5)               |
| 1-5 replies to texts                     | 77 (39.3)                                | 90 (46.4)                     | 167 (42.8)               |
| 6-10 replies to texts                    | 19 (9.7)                                 | 18 (9.3)                      | 37 (9.5)                 |
| 11-15 replies to texts                   | 8 (4.1)                                  | 13 (6.7)                      | 21 (5.4)                 |
| 16-20 replies texts                      | 10 (5.1)                                 | . (.)                         | 10 (2.6)                 |
| >20 replies to texts                     | 28 (14.3)                                | 12 (6.2)                      | 40 (10.3)                |
| Number of replies to texts, mean (SD); n | 8.8 (18.9)                               | 8.6 (33.8)                    | 8.7 (27.3)               |
| Stopping texts, n (%)                    | 30 (15.3)                                | 40 (20.6)                     | 70 (17.9)                |

**eTable 9. Post-randomization website engagement by all trial participants over 12 months**

|                                                 |                                 | <b>Texts with incentives<br/>N=196</b> | <b>Texts-only<br/>N=194</b> | <b>Waiting list<br/>N=195</b> |
|-------------------------------------------------|---------------------------------|----------------------------------------|-----------------------------|-------------------------------|
| Participants logging on to participant webpages | n (%)                           | 147 (75.0)                             | 131 (67.5)                  | 88 (45.1)                     |
| Number of logs per participant                  | Mean (SD)                       | 14.4 (41.7),                           | 12.3 (68.2),                | 2.1 (2.2)                     |
|                                                 | Median (quartile1 – quartile 3) | 4 (2-9)                                | 3 (1-7)                     | 1 (1-2)                       |

**eTable 10. Intervention group engagement with website self-monitoring and local resources webpage over 12 months**

|                                                                 | <b>Texts with incentives<br/>N=196</b> | <b>Texts only<br/>N=194</b> | <b>Total<br/>N=390</b> |
|-----------------------------------------------------------------|----------------------------------------|-----------------------------|------------------------|
| Participants recording weight n (%)                             | 26 (13.3)                              | 19 (9.8)                    | 45 (11.5)              |
| Participants recording steps n (%)                              | 17 (8.7)                               | 12 (6.2)                    | 29 (7.4)               |
| Participants recording motivating pictures n (%)                | 4 (2.0)                                | . (.)                       | 4 (1.0)                |
| Participants recording in diary n (%)                           | 16 (8.2)                               | 7 (3.6)                     | 23 (5.9)               |
| Number of participants self-monitoring n (%)                    | 29 (14.8)                              | 21 (10.8)                   | 50 (12.8)              |
| Used no self-monitoring feature n (%)                           | 167 (85.2)                             | 173 (89.2)                  | 340 (87.2)             |
| Used one self-monitoring feature n (%)                          | 9 (4.6)                                | 9 (4.6)                     | 18 (4.6)               |
| Used two self-monitoring features n (%)                         | 8 (4.1)                                | 7 (3.7)                     | 15 (3.9)               |
| Used three self-monitoring features n (%)                       | 10 (5.1)                               | 5 (2.6)                     | 15 (3.9)               |
| Used four self-monitoring features n (%)                        | 2 (1.0)                                | . (.)                       | 2 (0.5)                |
| Number of times participants recorded weight n (%)              | 13.0 (29.2), 29                        | 4.5 (5.6), 21               | 9.5 (22.8), 50         |
| Number of times participants recorded steps n (%)               | 14.2 (30.8), 29                        | 22.1 (68.0), 21             | 17.5 (49.4), 50        |
| Number of times participants recorded motivating pictures n (%) | 0.6 (2.6), 29                          | 0 (0), 21                   | 0.3 (2.0), 50          |
| Number of times participants recorded in diary n (%)            | 1.7 (2.4), 29                          | 0.8 (1.4), 21               | 1.3 (2.1), 50          |
| <b>Number of participants using local resource pages; n (%)</b> |                                        |                             |                        |
| Did not use                                                     | 152 (77.6)                             | 165 (85.1)                  | 317 (81.3)             |
| Used once                                                       | 28 (14.3)                              | 18 (9.3)                    | 46 (11.8)              |
| Used two times or more                                          | 16 (8.2)                               | 11 (5.7)                    | 27 (6.9)               |
| <b>Number of participants using main resource page; n (%)</b>   |                                        |                             |                        |
| Did not use                                                     | 159 (81.1)                             | 160 (82.5)                  | 319 (81.8)             |
| Used once                                                       | 22 (11.2)                              | 23 (11.9)                   | 45 (11.5)              |
| Used two times or more                                          | 15 (7.7)                               | 11 (5.7)                    | 26 (6.7)               |

**eTable 11. Primary outcome: percentage weight change at 12 months from baseline**

|                   | Texts with incentives |                     |                   | Texts only          |                     |                   | Control             |                     |                   | Difference in mean change from baseline: Incentives v control (97.5% CI) | p-value | Difference in mean change from baseline: texts v control (97.5% CI) | p-value |
|-------------------|-----------------------|---------------------|-------------------|---------------------|---------------------|-------------------|---------------------|---------------------|-------------------|--------------------------------------------------------------------------|---------|---------------------------------------------------------------------|---------|
|                   | Baseline Weight kg    | 12 Month Weight kg  | % Change          | Baseline Weight kg  | 12 Month Weight kg  | % Change          | Baseline Weight kg  | 12 Month Weight kg  | % Change          |                                                                          |         |                                                                     |         |
| 12m weight % loss | 120.3 (20.1); [196]   | 114.4 (21.0); [146] | -4.8 (6.1); [146] | 117.2 (17.9); [194] | 112.9 (18.6); [128] | -2.7 (6.3); [128] | 118.1 (21.6); [195] | 113.6 (20.9); [152] | -1.3 (5.5); [152] | -3.5 <sup>a</sup> (-5.1, -2.0)                                           | <0.001  | -1.5 <sup>a</sup> (-3.1, 0.1)                                       | 0.040   |
|                   |                       |                     |                   |                     |                     |                   |                     |                     |                   | -3.2 <sup>b</sup> (-4.6, -1.9)                                           | <0.001  | -1.4 <sup>b</sup> (-2.9, 0.0);                                      | 0.053   |

Cells are mean (SD) [N]. <sup>a</sup> Estimate from linear regression model adjusting for area and method of recruitment and using all observed outcome data. <sup>b</sup> Estimate from linear regression model adjusting for area and recruitment strategy and using multiple imputation, the auxiliary model used baseline weight, method of recruitment, deprivation, area, height and age to impute missing weights, imputed separately by treatment arm.



**eTable 12. Weight change in kilograms at 12 months from baseline**

| <b>Variable - mean (SD); n</b>                         | <b>Texts with incentives (N=196)</b> | <b>Texts only (N=194)</b> | <b>Waiting list control (N=195)</b> |
|--------------------------------------------------------|--------------------------------------|---------------------------|-------------------------------------|
| Baseline Weight (kg)                                   | 120.3 (20.1); 196                    | 117.2 (17.9); 194         | 118.1 (21.6); 195                   |
| Weight Change (kg)                                     | -5.7 (7.4); 146                      | -3.0 (7.5); 128           | -1.5 (6.5); 152                     |
| Mean difference versus control (97.5% CI) <sup>a</sup> | -4.1 (-6.0, -2.3)                    | -1.6 (-3.5, 0.4)          |                                     |

<sup>a</sup>All observed cases.

**eTable 13. Weight change at 3 months and 6 months from baseline for intervention groups**

| <b>Variables - mean (SD); n</b>   | <b>Texts with incentive 3 months (N=196)</b> | <b>Texts only 3 months (N=194)</b> | <b>Texts with incentive 6 months (N=196)</b> | <b>Texts only 6 months (N=194)</b> |
|-----------------------------------|----------------------------------------------|------------------------------------|----------------------------------------------|------------------------------------|
| Weight change (%) - mean (SD), n  | -3.8 (3.3); 170                              | -2.5 (3.6); 136                    | -5.8 (5.1); 140                              | -3.4 (5.8); 121                    |
| Weight change (kg) - mean (SD), n | -4.5 (4.0); 170                              | -2.9 (4.4); 136                    | -6.8 (6.1); 140                              | -4.0 (7.2); 121                    |

**eTable 14: Secondary outcomes by trial group**

| Variables - mean (SD); n | Baseline                      |                    |                    | 12 Months                     |                    |                    | Texts with Incentive vs Control Mean Difference / Odds Ratio (97.5% CI) | Texts only vs Control Mean Difference / Odds Ratio (97.5% CI) |
|--------------------------|-------------------------------|--------------------|--------------------|-------------------------------|--------------------|--------------------|-------------------------------------------------------------------------|---------------------------------------------------------------|
|                          | Texts with incentives (N=196) | Texts only (N=194) | Waiting list       | Texts with incentives (N=196) | Texts only (N=194) | Waiting list       |                                                                         |                                                               |
| WEMWBS <sup>a</sup>      | 46.9 (9.3); 192               | 46.7 (9.1); 191    | 46.9 (8.1); 192    | 49.1 (9.8); 143               | 47.2 (9.3); 125    | 47.2 (9.8); 151    | 1.85 (-0.15, 3.86)                                                      | -0.31 (-2.38, 1.76)                                           |
| PHQ4 <sup>b</sup>        | 2.3 (2.5); 140                | 2.6 (2.7); 140     | 2.1 (2.3); 142     | 2.2 (2.8); 140                | 2.5 (2.8); 121     | 2.2 (2.5); 149     | 0.02 (-0.64, 0.67)                                                      | 0.49 (-0.18, 1.17)                                            |
| WSSQ <sup>c</sup>        | 35.7 (8.6); 193               | 34.9 (8.7); 192    | 35.5 (8.2); 191    | 34.1 (8.4); 142               | 33.1 (8.8); 127    | 34.8 (8.1); 152    | -1.23 (-2.84, 0.38)                                                     | -0.43 (-2.08, 1.22)                                           |
| EQ5D <sup>d</sup>        | 0.726 (0.229); 194            | 0.741 (0.230); 192 | 0.721 (0.207); 191 | 0.762 (0.240); 143            | 0.719 (0.258); 127 | 0.769 (0.192); 149 | 0.00 (-0.04, 0.04)                                                      | -0.05 (-0.09, 0.01)                                           |
| EQ5DVAS <sup>e</sup>     | 61.6 (18.7); 194              | 62.9 (19.0); 186   | 62.3 (19.0); 193   | 69.9 (17.6); 142              | 68.8 (19.7); 121   | 65.7 (16.6); 148   | 5.00 (0.76, 9.25)                                                       | 3.71 (-0.75, 8.16)                                            |
| EQ5D_AD <sup>f</sup>     | 1.8 (1.0); 194                | 1.8 (0.9); 193     | 1.9 (1.0); 194     | 1.8 (1.0); 144                | 1.8 (1.0); 128     | 1.8 (0.9); 150     | 0.96 (0.56, 1.67)                                                       | 1.16 (0.67, 2.01)                                             |

a Warwick-Edinburgh Mental Well-Being Score (14-70): Linear Regression b Patient Health Questionnaire (0-12): Linear regression c Weight Self-Stigma Questionnaire (12-60): Linear regression dEuroQol-5 Dimension (-0.594 – 1): Linear regression e EuroQol-5 Dimension Visual Analog Score (0-100): Linear regression f EuroQol-5 Anxiety/Depression Dimension (1-5): Ordinal logistic regression

**eTable 15. Participant satisfaction with the Game of Stones trial and with weight loss progress at 12 months**

| <b>Variable - mean (SD); n</b>                                                                                         | <b>Texts with incentives (N=196)</b> | <b>Texts only (N=194)</b> | <b>Waiting list (N=195)</b> | <b>Texts with incentives vs Waiting list</b><br>Effect size (97.5% CI); p-value | <b>Texts only vs Waiting list</b><br>Effect size (97.5% CI); p-value |
|------------------------------------------------------------------------------------------------------------------------|--------------------------------------|---------------------------|-----------------------------|---------------------------------------------------------------------------------|----------------------------------------------------------------------|
| Programme satisfaction<br>(Visual analogue scale: 0 is not satisfied at all; 100 is completely satisfied) <sup>a</sup> | 84.8 (22.6); 133                     | 76.6 (26.0); 113          | 66.4 (29.3); 136            | 18.6 (11.4, 25.8); <0.001                                                       | 10.3 (2.7, 17.8); 0.002                                              |
| Happy with weight loss progress<br>Categories 1 (very unhappy) -7 (very happy) <sup>b</sup>                            | 4.1 (1.9); 145                       | 3.9 (1.6); 128            | 3.6 (1.5); 151              | 1.7 (1.0, 2.6); 0.017                                                           | 1.3 (0.8, 2.1); 0.179                                                |

<sup>a</sup>effect size is mean difference from a linear regression; <sup>b</sup>effect size is an odds ration from an ordered categories logistic regression.

**eTable 16. Sensitivity analyses for the primary outcome**

| <b>Variable - mean (SD); n</b>                                         | <b>Texts with incentives</b> | <b>Texts only</b>       | <b>Waiting list</b> |
|------------------------------------------------------------------------|------------------------------|-------------------------|---------------------|
| Baseline Weight kg                                                     | 120.3 (20.1); 196            | 117.2 (17.9); 194       | 118.1 (21.6); 195   |
| Percentage Change (strict weight assessment protocol <sup>a</sup> )    | -5.0 (6.2); 137              | -2.8 (6.4); 118         | -1.4 (5.5); 142     |
| Mean difference versus control (97.5% CI); p-value <sup>b</sup>        | -3.6 (-5.2, -2.0); <0.001    | -1.5 (-3.2, 0.2); 0.053 |                     |
| Mean difference versus control (97.5% CI); p-value <sup>c</sup>        | -3.2 (-4.7, -1.7); <0.001    | -1.2 (-2.9, 0.4); 0.149 |                     |
| Percentage Change (baseline observation carried forward <sup>d</sup> ) | -3.6 (5.7); 196              | -1.8 (5.3); 194         | -1.0 (4.8); 195     |
| Mean difference versus control (97.5% CI); p-value <sup>b</sup>        | -2.6 (-3.8, -1.4); <0.001    | -0.8 (-2.0, 0.4); 0.140 |                     |
| Percentage Change (last observation carried forward <sup>e</sup> )     | -3.8 (5.7); 196              | -2.0 (5.3); 194         | -1.0 (4.8); 195     |
| Mean difference versus control (97.5% CI); p-value <sup>b</sup>        | -2.8 (-4.0, -1.6); <0.001    | -1.0 (-2.2, 0.2); 0.062 |                     |

<sup>a</sup> Strict weight assessment protocol was weight taken within 23 days of the target date and on study scales (in person or by video) <sup>b</sup> All observed cases. <sup>c</sup> Multiple imputation. <sup>d</sup> Baseline observation carried forward applies to all three trial groups. <sup>e</sup> Last observation carried forward will be either baseline, 3 m or 6m weight for the two intervention groups. For the control group last observation carried forward will be the baseline weight

**eTable 17. Use of publicly funded weight loss services, weight loss medications or meal replacements in previous 12 months**

|                                                                                                                                                                               | <b>N= total observed; n= number of cases</b> | <b>Texts with incentives (N=196)</b> | <b>Texts only (N=194)</b> | <b>Waiting list (N=195)</b> |
|-------------------------------------------------------------------------------------------------------------------------------------------------------------------------------|----------------------------------------------|--------------------------------------|---------------------------|-----------------------------|
| Attended a subsidised (e.g. vouchers) or paid for group-based programme such as Weight Watchers or Slimming World or similar meetings                                         | N, n, (%)                                    | 147, 6, (4.1)                        | 129, 5, (3.9)             | 151, 10, (6.6)              |
| Attended a subsidised or paid for gym, leisure centre or local sport facility to swim or take part in other physical activity sessions?                                       | N, n, (%)                                    | 145, 25, (17.2)                      | 128, 33, (25.8)           | 149, 32, (21.5)             |
| Attended a subsidised or paid for health trainer programme                                                                                                                    | N, n, (%)                                    | 145, 6, (4.1)                        | 127, 6, (4.7)             | 150, 8, (5.3)               |
| Attended a subsidised or paid for exercise referral scheme                                                                                                                    | N, n, (%)                                    | 145, 2, (1.4)                        | 128, 0, (0)               | 149, 3, (2.0)               |
| Attended a subsidised or paid for weight management programme at a Community Pharmacy                                                                                         | N, n, (%)                                    | 145, 4, (2.8)                        | 128, 0, (0)               | 152, 0, (0)                 |
| Have taken weight loss pills prescribed by the GP or hospital prescribed                                                                                                      | N, n, (%)                                    | 145, 0, (0)                          | 128, 2, (1.6)             | 150, 4, (2.7)               |
| Have had <u>daily</u> weight loss injections prescribed by the GP or hospital prescribed                                                                                      | N, n, (%)                                    | 145, 0, (0)                          | 127, 0, (0)               | 152, 0, (0)                 |
| Have had <u>weekly</u> weight loss injections prescribed by the GP or hospital prescribed                                                                                     | N, n, (%)                                    | 144, 0, (0)                          | 128, 5, (3.9)             | 152, 1, (0.7)               |
| Have taken meal replacement drinks for weight loss prescribed by the GP or hospital prescribed where the NHS has paid for them (e.g. Optifast, Slim-Fast, The Cambridge Diet) | N, n, (%)                                    | 144, 2, (1.4)                        | 129, 3, (2.3)             | 151, 2, (1.3)               |
| Attended an appointment with an NHS dietician for weight management                                                                                                           | N, n, (%)                                    | 144, 5, (3.5)                        | 128, 2, (1.6)             | 149, 4, (2.7)               |
| Any of these                                                                                                                                                                  | N, n, (%)                                    | 145, 35, (24.1)                      | 128, 44, (34.4)           | 153, 49, (32.0)             |
| <b>In the last 12 months I have paid for the following myself:</b>                                                                                                            |                                              |                                      |                           |                             |
|                                                                                                                                                                               |                                              | <b>Texts with incentives</b>         | <b>Texts only</b>         | <b>Waiting list</b>         |
| Weight loss pills                                                                                                                                                             | N, n, (%)                                    | 144, 6, (4.2)                        | 128, 3, (2.3)             | 153, 3, (1.9)               |
| Daily weight loss injections                                                                                                                                                  | N, n, (%)                                    | 142, 1, (0.7)                        | 128, 0, (0)               | 153, 2, (1.3)               |
| Weekly weight loss injections                                                                                                                                                 | N, n, (%)                                    | 142, 0, (0)                          | 127, 2, (1.6)             | 153, 0, (0)                 |
| Meal replacement drinks e.g. Optifast, Slim-Fast, The Cambridge Diet                                                                                                          | N, n, (%)                                    | 143, 16, (11.2)                      | 128, 10, (7.8)            | 153, 7, (4.6)               |

**eTable 18. Sensitivity analyses for participants not taking weight loss medications or meal replacements**

| <b>Variable - mean (SD); n</b> | <b>Texts with incentives (N=196)</b> | <b>Texts only (N=194)</b> | <b>Waiting list (N=195)</b> | <b>Texts with incentives vs Waiting list<br/>Mean difference (97.5% CI); p-value</b> | <b>Texts only vs Waiting list<br/>Mean difference (97.5% CI); p-value</b> |
|--------------------------------|--------------------------------------|---------------------------|-----------------------------|--------------------------------------------------------------------------------------|---------------------------------------------------------------------------|
| Baseline Weight                | 120.3 (20.1);<br>196                 | 117.2 (17.9);<br>194      | 118.1 (21.6);<br>195        | .                                                                                    | .                                                                         |
| 12 Month Weight                | 113.6 (20.2);<br>128                 | 111.7 (18.1);<br>109      | 112.1 (18.2);<br>138        |                                                                                      |                                                                           |
| Percentage Change              | -4.9 (6.2);<br>128                   | -2.8 (6.4);<br>109        | -1.2 (5.5);<br>138          | -3.6 (-5.3, -2.0); <0.001                                                            | -1.6 (-3.4, 0.1); 0.037                                                   |
| Multiple Imputation            | .                                    | .                         | .                           | -2.7 (-4.2, -1.1); 0.001                                                             | -1.1 (-2.7, 0.5); 0.188                                                   |

**eTable 19. Harms reported by participants since last seen**

| Assessment time point - n | Texts with incentives<br>N= 196 |       | Texts only<br>N= 194   |       | Waiting list<br>N= 195 |       |
|---------------------------|---------------------------------|-------|------------------------|-------|------------------------|-------|
|                           | Serious adverse events          | Harms | Serious adverse events | Harms | Serious adverse events | Harms |
| 3 months                  | 4                               | 30    | 1                      | 32    | N/A                    | N/A   |
| 6 months                  | 3                               | 35    | 1                      | 34    | N/A                    | N/A   |
| 12 months                 | 5                               | 49    | 3                      | 41    | 6                      | 45    |

N= those randomized to each group, n=participants reporting at least one SAE or harm.

**eTable 20. Participants reporting harms at one or more time point.**

|                                                                            | <b>Texts with<br/>incentives<br/>N= 196</b> | <b>Texts only<br/>N= 194</b> | <b>Waiting list<br/>N= 195</b> |
|----------------------------------------------------------------------------|---------------------------------------------|------------------------------|--------------------------------|
| Reported either a serious adverse event or a harm at only one time point-n | 94                                          | 77                           | 49                             |
| Reported either a serious adverse event or a harm at two time points-n     | 25                                          | 28                           | N/A                            |
| Reported either a serious adverse event or a harm at three time points-n   | 4                                           | 4                            | N/A                            |

n=participants reporting at least one SAE or harm.



**eTable 21. MedDRA System Organ Classification of harms**

| 3-month assessment                                   |                              |       |                        |       |                        |       |
|------------------------------------------------------|------------------------------|-------|------------------------|-------|------------------------|-------|
| MedDRA System Organ Classification                   | Texts with incentives N= 196 |       | Texts only N= 194      |       | Waiting list N= 195    |       |
|                                                      | Serious Adverse Events       | Harms | Serious Adverse Events | Harms | Serious Adverse Events | Harms |
|                                                      |                              |       |                        |       | N/A                    | N/A   |
| Blood and lymphatic system disorders                 | -                            | -     | -                      | 1     | -                      | -     |
| Cardiac disorders                                    | -                            | -     | -                      | 1     | -                      | -     |
| Ear and labyrinth disorders                          | -                            | -     | -                      | 1     | -                      | -     |
| Endocrine disorders                                  | -                            | 1     | -                      | 1     | -                      | -     |
| Eye disorders                                        | -                            | -     | -                      | -     | -                      | -     |
| Gastrointestinal disorders                           | -                            | 2     | -                      | 1     | -                      | -     |
| General disorders and administration site conditions | -                            | 2     | -                      | 1     | -                      | -     |
| Hepatobiliary disorders                              | 1                            | 1     | -                      | -     | -                      | -     |
| Immune system disorders                              | -                            | -     | -                      | -     | -                      | -     |
| Infections and infestations                          | -                            | 1     | 1                      | 1     | -                      | -     |
| Infections and infestations (Covid)                  | -                            | 11    | -                      | 8     | -                      | -     |
| Injury, poisoning, and procedural complications      | 1                            | 2     | -                      | 3     | -                      | -     |
| Investigations                                       | -                            | 2     | -                      | 1     | -                      | -     |
| Metabolism and nutrition disorders                   | -                            | -     | -                      | -     | -                      | -     |
| Musculoskeletal and connective tissue disorders      | -                            | 9     | -                      | 1     | -                      | -     |
| Neoplasms benign, malignant and unspecified          | -                            | -     | -                      | 1     | -                      | -     |
| Nervous system disorders                             | -                            | -     | -                      | 1     | -                      | -     |
| Psychiatric disorders                                | -                            | 6     | -                      | 3     | -                      | -     |
| Renal and urinary disorders                          | -                            | -     | -                      | -     | -                      | -     |
| Reproductive system and breast disorders             | -                            | -     | -                      | -     | -                      | -     |
| Respiratory, thoracic and mediastinal disorders      | -                            | -     | -                      | -     | -                      | -     |
| Skin and subcutaneous tissue disorders               | -                            | -     | -                      | -     | -                      | -     |
| Surgical and medical procedures                      | 1                            | 1     | -                      | 2     | -                      | -     |
| Vascular disorders                                   | 1                            | 2     | -                      | 3     | -                      | -     |
| Social harms                                         | -                            | 3     | -                      | 8     | -                      | -     |
| Total                                                | 4                            | 43    | 1                      | 38    | N/A                    | N/A   |

| 6-month assessment                                   |                              |       |                        |       |                        |       |
|------------------------------------------------------|------------------------------|-------|------------------------|-------|------------------------|-------|
| MedDRA System Organ Classification                   | Texts with incentives N= 196 |       | Texts only N= 194      |       | Waiting list N= 195    |       |
|                                                      | Serious Adverse Events       | Harms | Serious Adverse Events | Harms | Serious Adverse Events | Harms |
|                                                      |                              |       |                        |       | N/A                    | N/A   |
| Blood and lymphatic system disorders                 | -                            | -     | -                      | -     | -                      | -     |
| Cardiac disorders                                    | -                            | -     | -                      | 1     | -                      | -     |
| Ear and labyrinth disorders                          | -                            | -     | -                      | -     | -                      | -     |
| Endocrine disorders                                  | -                            | 1     | -                      | 2     | -                      | -     |
| Eye disorders                                        | -                            | -     | -                      | 1     | -                      | -     |
| Gastrointestinal disorders                           | -                            | 1     | -                      | 3     | -                      | -     |
| General disorders and administration site conditions | -                            | 2     | -                      | -     | -                      | -     |
| Hepatobiliary disorders                              | -                            | 1     | -                      | 1     | -                      | -     |
| Immune system disorders                              | -                            | 1     | -                      | 1     | -                      | -     |
| Infections and infestations                          | -                            | 2     | -                      | 3     | -                      | -     |
| Infections and infestations (Covid)                  | -                            | 9     | -                      | 7     | -                      | -     |
| Injury, poisoning, and procedural complications      | -                            | 2     | -                      | 5     | -                      | -     |
| Investigations                                       | -                            | -     | -                      | 2     | -                      | -     |
| Metabolism and nutrition disorders                   | -                            | -     | -                      | -     | -                      | -     |
| Musculoskeletal and connective tissue disorders      | -                            | 7     | -                      | 6     | -                      | -     |
| Neoplasms benign, malignant and unspecified          | -                            | -     | -                      | 3     | -                      | -     |
| Nervous system disorders                             | -                            | -     | -                      | -     | -                      | -     |
| Psychiatric disorders                                | 1                            | 4     | -                      | 1     | -                      | -     |
| Renal and urinary disorders                          | -                            | -     | 1                      | -     | -                      | -     |
| Reproductive system and breast disorders             | -                            | -     | -                      | -     | -                      | -     |
| Respiratory, thoracic and mediastinal disorders      | 1                            | -     | -                      | 1     | -                      | -     |
| Skin and subcutaneous tissue disorders               | -                            | -     | -                      | 1     | -                      | -     |
| Surgical and medical procedures                      | 1                            | 4     | -                      | 1     | -                      | -     |
| Vascular disorders                                   | -                            | 2     | -                      | 1     | -                      | -     |
| Social harms                                         | -                            | 7     | -                      | 3     | -                      | -     |
| Total                                                | 3                            | 43    | 1                      | 43    | N/A                    | N/A   |

| 12-month assessment                                  |                              |       |                        |       |                        |       |
|------------------------------------------------------|------------------------------|-------|------------------------|-------|------------------------|-------|
| MedDRA System Organ Classification                   | Texts with incentives N= 196 |       | Texts only N= 194      |       | Waiting list N= 195    |       |
|                                                      | Serious Adverse Events       | Harms | Serious Adverse Events | Harms | Serious Adverse Events | Harms |
| Blood and lymphatic system disorders                 | -                            | -     | -                      | -     | -                      | -     |
| Cardiac disorders                                    | -                            | 2     | -                      | 1     | 1                      | 1     |
| Ear and labyrinth disorders                          | -                            | -     | -                      | 1     | -                      | 1     |
| Endocrine disorders                                  | -                            | 2     | -                      | -     | -                      | 4     |
| Eye disorders                                        | -                            | -     | -                      | -     | -                      | -     |
| Gastrointestinal disorders                           | -                            | -     | 1                      | 1     | 1                      | 2     |
| General disorders and administration site conditions | -                            | -     | -                      | -     | -                      | -     |
| Hepatobiliary disorders                              | -                            | 1     | 1                      | 1     | 1                      | -     |
| Immune system disorders                              | -                            | -     | -                      | -     | -                      | -     |
| Infections and infestations                          | 1                            | 4     | 1                      | 2     | -                      | 6     |
| Infections and infestations (Covid)                  | 2                            | 9     | -                      | 5     | -                      | 10    |
| Injury, poisoning, and procedural complications      | -                            | 8     | -                      | 2     | 1                      | 3     |
| Investigations                                       | -                            | -     | -                      | 1     | -                      | 1     |
| Metabolism and nutrition disorders                   | -                            | -     | -                      | -     | -                      | 1     |
| Musculoskeletal and connective tissue disorders      | -                            | 7     | -                      | 5     | -                      | 4     |
| Neoplasms benign, malignant and unspecified          | -                            | 4     | -                      | 1     | -                      | 2     |
| Nervous system disorders                             | -                            | 1     | -                      | -     | -                      | 2     |
| Psychiatric disorders                                | 1                            | 4     | -                      | 1     | -                      | 6     |
| Renal and urinary disorders                          | -                            | -     | -                      | 5     | -                      | 1     |
| Reproductive system and breast disorders             | -                            | 1     | -                      | -     | -                      | -     |
| Respiratory, thoracic and mediastinal disorders      | -                            | -     | -                      | 1     | -                      | 1     |
| Skin and subcutaneous tissue disorders               | -                            | 1     | -                      | -     | -                      | 1     |
| Surgical and medical procedures                      | 1                            | 4     | -                      | 4     | -                      | 5     |
| Vascular disorders                                   | -                            | 2     | -                      | 5     | 2                      | 2     |
| Social harms                                         | -                            | 12    | -                      | 15    | -                      | 10    |
| Total                                                | 5                            | 62    | 3                      | 51    | 6                      | 63    |

**eTable 22. Unexpected benefits reported by participants**

|                                                                                      | Texts with incentives<br>N= 196 | Texts only<br>N= 194 | Waiting list<br>N= 195 |
|--------------------------------------------------------------------------------------|---------------------------------|----------------------|------------------------|
| Assessment time point - number of participants reporting at least one benefit.       | Unexpected benefits             | Unexpected benefits  | Unexpected benefits    |
| 3 months                                                                             | 30                              | 15                   | N/A                    |
| 6 months                                                                             | 30                              | 21                   | N/A                    |
| 12 months                                                                            | 20                              | 9                    | 7                      |
| <b>The number of participants (n) reporting a benefit at one or more time points</b> |                                 |                      |                        |
| Reported a benefit at only one time point-n                                          | 57                              | 38                   | 7                      |
| Reported a benefit at two time points-n                                              | 19                              | 7                    | 0                      |
| Reported a benefit at three time points-n                                            | 4                               | 0                    | 0                      |

**eFigure 1. Sensitivity analysis for participants not taking weight loss medications or meal replacements.**

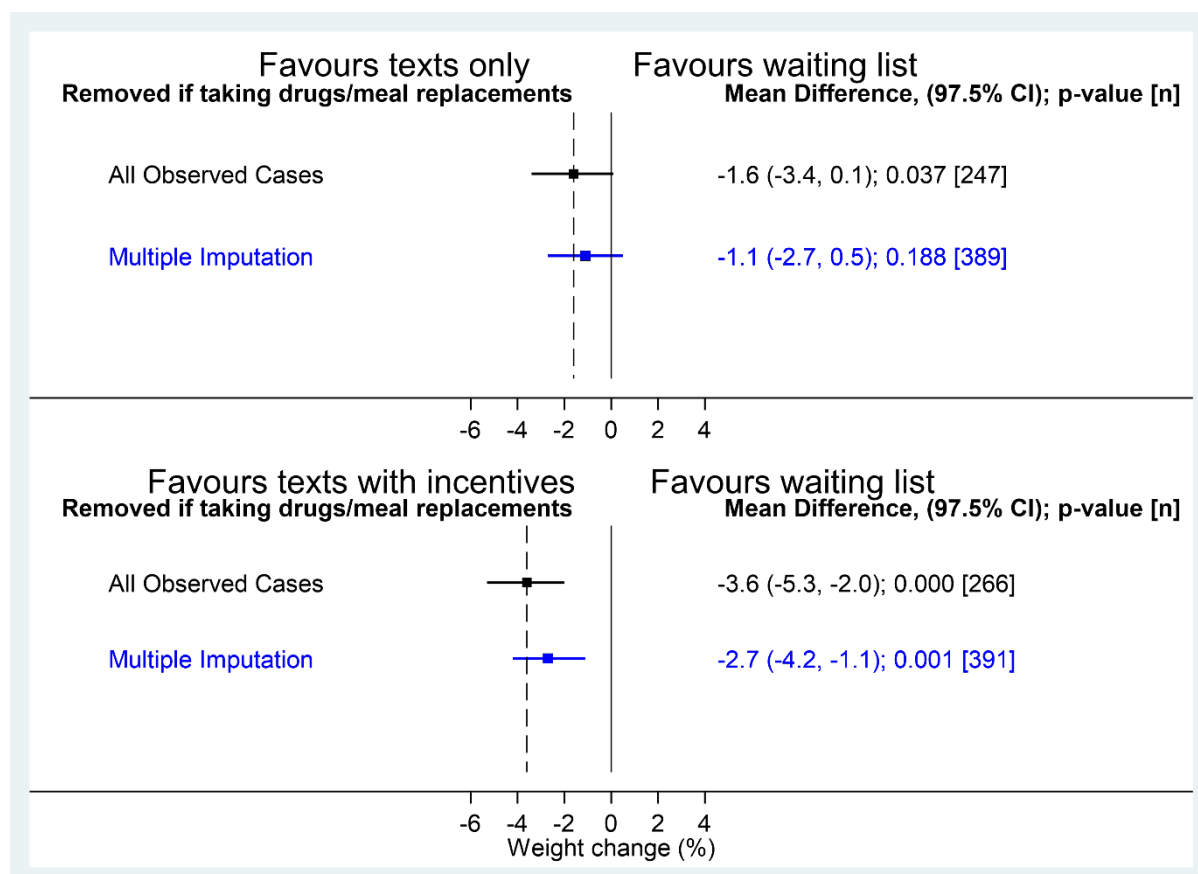

## E-METHODS

All versions of the trial protocol are available on the funder webpage for the Game of Stones Trial:  
<https://www.fundingawards.nihr.ac.uk/award/NIHR129703>

### Incentive structure and payment protocol

Participants allocated to the texts with incentive group are informed that Game of Stones has put £400 into an account for them and they are given a mock-up cheque. The following text is from the participant information leaflet.

#### How will the financial incentives work?

£400 is already in an account for you. You will lose part of this £400 for each weight loss target you do not meet and 'secure' money for each target you do achieve. At the end of the 12 months you will receive the money you have managed to secure.

The £400 is yours if you meet the following weight loss targets:

- 5% of your starting weight at 3 months = £50
- 10% of your starting weight at 6 months = £150
- 10% of your starting weight at 12 months = £200

**Please Note** – For weight loss of between 5% and 10% of your starting weight at 6 and 12 months you can secure some, but not all of the money – see tables below. At 12 months you must weigh less than your starting weight to receive any of the money.

The researcher will give you a card with your target number of lbs/kgs to lose.

#### 3 months: 5% weight loss target for £50

If you do not lose at least 5% of your starting weight by 3 months, you will lose the £50 at this time point.

|              | Money secured | Money lost |
|--------------|---------------|------------|
| Less than 5% | £0            | £50        |
| 5% or more   | £50           | £0         |

#### 6 months: 10% weight loss target for £150

- If you do not lose at least 5% of your starting weight by 6 months, you will lose the £150 at this time point.
- If you lose 5% of your starting weight by 6 months you will secure £75. For every 1% of weight lost between 5% and the 10% target you will secure an additional £15.
- If you lose 10% of your starting weight at 6 months you will secure the full £150.

|              | Money secured | Money lost |
|--------------|---------------|------------|
| Less than 5% | £0            | £150       |
| 5%           | £75           | £75        |
| 6%           | £90           | £60        |
| 7%           | £105          | £45        |
| 8%           | £120          | £30        |
| 9%           | £135          | £15        |
| 10% or more  | £150          | £0         |

#### 12 months: 10% weight loss or maintenance target for £200

- If you do not lose at least 5% of your starting weight by 12 months, you will lose the £200 at this time point.
- If you lose 5% of your starting weight by 12 months you will secure £100. For every 1% of weight lost between 5% and the 10% target you will secure an additional £20.
- If you lose 10% of your starting weight by 12 months you will secure the full £200.

|              | Money secured | Money lost |
|--------------|---------------|------------|
| Less than 5% | £0            | £200       |
| 5%           | £100          | £100       |
| 6%           | £120          | £80        |
| 7%           | £140          | £60        |
| 8%           | £160          | £40        |
| 9%           | £180          | £20        |
| 10% or more  | £200          | £0         |

To secure your money, you must be weighed by a researcher on the Game of Stones scales within 3 weeks of your weight loss target date.

There was one protocol deviation by a researcher at the weight assessment. A participant's six month weight visit was not arranged within the 23 day window due to researcher error. As per protocol in cases of researcher error, the automated incentive calculation was over-ruled and the six-month incentive amount was awarded to the participant for his weight loss.

## **Website resources provided to participants**

### **Website resources provided to ALL GROUPS:**

General weight management advice on main information webpage

#### **Looking After Yourself**

#### **Where can I find some general advice on getting fitter and healthier?**

Men's Health Forum: <https://www.menshealthforum.org.uk/>. This booklet can be downloaded for free: <https://www.mhfi.org/challenges2020.pdf>

#### **Where can I find out more about weight loss?**

NHS: <http://www.nhs.uk/livewell/weight-loss-guide/Pages/weight-loss-guide.aspx> - OR the British Dietetic Association: <https://www.bda.uk.com/resource/weight-loss.html>

#### **Can I just be more active or exercise more to lose weight?**

Physical activity will get you part of the way and will benefit your health BUT research shows that it is very difficult for men to lose weight through exercise alone. The good news is that being active can help prevent the weight creeping up again. This link gives more information: <https://www.nhs.uk/better-health/get-active/>

#### **How can I find out more about losing weight and food facts for particular health conditions?**

The British Dietetic Association: <https://www.bda.uk.com/food-health/food-facts/all-food-fact-sheets.html>

#### **I have diabetes where can I find information on health and weight?**

Diabetes UK: <https://www.diabetes.org.uk/guide-to-diabetes/enjoy-food/eating-with-diabetes/whats-your-healthy-weight/lose-weight>

#### **I'm on a budget where can I find out about eating well for less?**

British Dietetic Association: <https://www.bda.uk.com/resource/food-facts-eat-well-spend-less.html>

#### **I'm finding it hard to cope with how I feel, where can I find help?**

Men's Health Forum <https://www.menshealthforum.org.uk/howru-hub> OR Living Life to the Full <https://l1ttf.com>. **If you need help right now** please contact the Samaritans: T:116 123; E: [jo@samaritans.org](mailto:jo@samaritans.org). Its free and available 24 hours a day.

**DISCLAIMER – Food is not regulated to the same standards as medicines. Not all information is trustworthy. These websites are some of the most reliable science we have found BUT we can't guarantee they are up to date**

### Website resources provided to TEXTS ONLY AND TEXTS WITH INCENTIVE GROUPS:

- Function to add weight to website and track against target given at baseline.
- Function to monitor steps and enter step count on website.
- Function to keep a diary of progress.
- Function to upload self-motivating photographs.
- Access to information on managing text messages e.g. how to stop or change frequency.

### Website resources provided to TEXTS WITH INCENTIVES GROUP:

- Video explanation of how the incentives process works.
- Function to monitor progress toward incentive target.

### Local information provided to TEXTS ONLY AND TEXTS WITH INCENTIVES GROUPS:

Local help with weight loss? You can follow these links

#### Belfast

Public Health Agency <https://www.publichealth.hscni.net>

Public Health Agency links to other useful websites <https://www.publichealth.hscni.net/links>

Choose to Live Better (Public Health Agency) <https://www.choosetolivebetter.com/>

Safe Food (Department of Health) <https://www.safefood.net/healthy-eating>

#### Glasgow

Public Health Scotland <http://www.healthscotland.scot/health-topics/diet-and-healthy-weight/obesity>

Take life on, one step at a time (Scottish Government) <http://www.takelifeon.co.uk/>

#### Bristol

One You (South Gloucestershire Council) <https://oneyou.southglos.gov.uk/for-your-body/eat-well/weight-management/>

NHS Bristol, North Somerset, South Gloucestershire Clinical Commissioning Group

<https://bnssgccg.nhs.uk/health-advice-and-support/obesity-and-weight-management/>

Go4Life (North Somerset Council) [www.go4life.org](http://www.go4life.org)

## Harms and benefits

### Background

Reporting of harms and benefits in behavioral and lifestyle trials is often incomplete<sup>2</sup>, leading to problems with conclusions drawn from systematic reviews about harms caused by interventions.<sup>3</sup> Reporting adverse events and unintended consequences are core outcomes for in person weight management programmes.<sup>4</sup> Guidance specifically mentions eating disorders, worsening of a pre-existing condition and injuries sustained during a physical activity session as part of a weight management program. This is an underexplored area in self-care and digital behavioural weight management trials.

### Data collection

Section 8 of the trial protocol was adhered to for definitions, which specified expected, related and unintended consequences for trial participants. Harm and benefit data were collected in the Case Report Form below for all randomized participants at weight assessments: 3 months, 6 months and 12 months for intervention groups; and at 12 months only for the waiting list control group.

### Data collection sections of the case report form used in Game of Stones

|                                                                                                                                                                                                                                                             | No <input type="checkbox"/> | Yes <input type="checkbox"/> → |
|-------------------------------------------------------------------------------------------------------------------------------------------------------------------------------------------------------------------------------------------------------------|-----------------------------|--------------------------------|
| <b>Has anything unexpected happened since your last appointment as a result of taking part in the study (these can be either helpful or harmful consequences). Please tick NO or YES. If you tick 'yes' please describe what happened below.</b>            |                             |                                |
| IMPORTANT: Details of adverse events/ serious adverse events must be recorded in the reporting form below AND reported to the Trial Managers (Lisa Macaulay and Catriona O'Dolan) on <a href="mailto:gameofstones@stir.ac.uk">gameofstones@stir.ac.uk</a> . |                             |                                |
|                                                                                                                                                                                                                                                             |                             |                                |

|                                      |           |                                           | Assessment of AE – to be completed by PI                                       |                                                                                |                                                                                  |                               |
|--------------------------------------|-----------|-------------------------------------------|--------------------------------------------------------------------------------|--------------------------------------------------------------------------------|----------------------------------------------------------------------------------|-------------------------------|
| Adverse event – detailed description | Dates     | Outcome of AE                             | Serious Adverse Event?                                                         | Relationship to study intervention                                             | Expected?                                                                        | Initials & date of assessment |
|                                      | Notified: | Recovered<br><input type="checkbox"/>     | Serious<br><input type="checkbox"/><br>Not serious<br><input type="checkbox"/> | Related<br><input type="checkbox"/><br>Not related<br><input type="checkbox"/> | Expected<br><input type="checkbox"/><br>Not expected<br><input type="checkbox"/> |                               |
|                                      | Onset:    | Not recovered<br><input type="checkbox"/> |                                                                                |                                                                                |                                                                                  |                               |
|                                      | End:      | Fatal<br><input type="checkbox"/>         |                                                                                |                                                                                |                                                                                  |                               |

Fieldworkers knew that participants attending the 3- and 6- month assessments were allocated to one of the two intervention groups and were often unblinded when collecting this data. Continual assessment of fieldworker documented adverse events was undertaken throughout the trial by PH and AA who are medical practitioners and who were blind to group allocation. Assessors categorising and analysing data were blind to group allocation. The challenges of attribution and centre inconsistencies in the documentation of harms and benefits were discussed with the Trial Management Group and the Trial Steering Group.

### Analysis

The complete dataset was cleaned with any possible coding inconsistencies discussed and resolved by PH, LM, SC and, where necessary, discussion with the fieldworker who collected data. After data-lock, MedDRA (v26.1) (<https://www.meddra.org/>) classification was used by a trial manager (LM) blind to group allocation to categorise harms. Any uncertainties about classification were discussed between members of the harms and benefits team, blinded to group allocation (LM, SC, AA and PH).

Participants’ accounts interpreted the question “has anything unexpected happened?” very broadly. There was considerable uncertainty from participant accounts about the timing of the onset of the event in relation to the trial start to meet the protocol definition of an adverse event. This was particularly problematic for musculoskeletal and mental health conditions where participant accounts described fluctuating illness trajectories over time. Attribution to the trial interventions or trial processes was often not possible, particularly for participants living with pre-existing obesity related co-morbidities.

The CONSORT extension for harms<sup>5</sup> became available at the data cleaning stage. Due to the attribution and interpretation issues, a decision was made to not report adverse events according to whether they were expected and related to the trial or not. Serious adverse events are reported as described in the trial protocol V7.0. All adverse events or unexpected events coded as harmful are descriptively reported as “harms”. For anything unexpected reported a qualitative analysis decision was made by LM and PH about whether this was a harm; a benefit or a neutral statement where a decision could not be made. Only one benefit could be documented per participant per time point. However, more than one SAE and/or harm could be documented per participant per time point if the descriptions were medically unrelated. Neutral statements were made by six participants and are not included in the harms and benefits analysis (e.g., ‘*Now at the top of the list for an operation on his ankle and went for his pre-op assessment. This has been planned for several years but has been put off twice due to COVID*’). The social harms code in the MedDRA in the System Organ Classification was used for example when participants described bereavements, work, carer, relationship or pet related problems.

The descriptive statistical analysis of the frequency of harms and benefits by trial group was conducted by JS who was blind to group allocation. There was no interim analysis. Results are reported descriptively with the denominator for each time point.

## Adjusting index of multiple deprivation scores across UK countries

Each of the three UK countries participating in the Game of Stones Trial calculates an Index of Multiple Deprivations (IMD) for geographical small areas by postcode of residence. The methodology used to calculate the IMD differs by country and therefore it is not considered valid to simply combine IMD scores when analysing trial data for the purpose of exploring socio-demographic inequalities.



In the Statistical Analysis Plan V1.0 we proposed using Abel et al. 2016 methodology<sup>6</sup> to combine scores. In March 2023 in discussion with Gary Abel and Rupert Payne, and our Trial Steering Group it was agreed to use IMD scores for the most recent country specific databases, as randomization would balance any misclassification. This was updated in the Statistical Analysis Plan V2.0.

The databases used by co-author JS to look up participant postcodes of residence and assign an index of multiple deprivation quintile for an, who was blind to group allocation were:

Scotland: <https://www.gov.scot/publications/scottish-index-of-multiple-deprivation-2020v2-postcode-look-up/>

England: <https://imd-by-postcode.opendatacommunities.org/imd/2019>

Northern Ireland: <https://www.nisra.gov.uk/publications/central-postcode-directory-jul-2023-downloads>

## eReferences

1. Michie S, Richardson M, Johnston M, et al. The behavior change technique taxonomy (v1) of 93 hierarchically clustered techniques: building an international consensus for the reporting of behavior change interventions. *Ann Behav Med*. Aug 2013;46(1):81-95. doi:10.1007/s12160-013-9486-6
2. Papaioannou D, Cooper C, Mooney C, Glover R, Coates E. Adverse event recording failed to reflect potential harms: a review of trial protocols of behavioral, lifestyle and psychological therapy interventions. *J Clin Epidemiol*. 2021;136:64-76. doi:<https://doi.org/10.1016/j.jclinepi.2021.03.002>
3. Mayo-Wilson E, Qureshi R, Li T. Conducting separate reviews of benefits and harms could improve systematic reviews and meta-analyses. *Systematic Reviews*. 2023;12(1):67. doi:10.1186/s13643-023-02234-0
4. Mackenzie RM, Eells LJ, Simpson SA, Logue J. Core outcome set for behavioural weight management interventions for adults with overweight and obesity: Standardised reporting of lifestyle weight management interventions to aid evaluation (STAR-LITE). *Obes Rev*. Feb 2020;21(2):e12961. doi:10.1111/obr.12961
5. Junqueira DR, Zorzela L, Golder S, et al. CONSORT Harms 2022 statement, explanation, and elaboration: updated guideline for the reporting of harms in randomized trials. *J Clin Epidemiol*. 2023;158:149-165. doi:<https://doi.org/10.1016/j.jclinepi.2023.04.005>
6. Abel GA, Barclay ME, Payne RA. Adjusted indices of multiple deprivation to enable comparisons within and between constituent countries of the UK including an illustration using mortality rates. *BMJ Open*. 2016;6(11):e012750. doi:10.1136/bmjopen-2016-012750
