# Supplementary material
Source: PubMed Central journal article supplement (PMC11094620)
Supplement: jama-e247064-s004.pdf [file jama-e247064-s004.pdf]

## Data Sharing Statement

### Data

**Data available:** Yes

**Data types:** Deidentified participant data, Data dictionary

**How to access data:** Requests for access should be addressed to [chart@abdn.ac.uk](mailto:chart@abdn.ac.uk) and will be considered by the study team.

**When available:** With publication

### Supporting Documents

**Document types:** Other (please specify)

**Additional Information:** Statistical analysis plan and trial protocol can be provided as word or PDF files

**How to access documents:** Statistical analysis plan and trial protocol can be provided as word or PDF files

**When available:** With publication

### Additional Information

**Who can access the data:** Researchers whose proposed use of the data has been approved

**Types of analyses:** For a specified purpose

**Mechanisms of data availability:** Requests for access should be addressed to [chart@abdn.ac.uk](mailto:chart@abdn.ac.uk) and will be considered by the study team.
